# Supplementary material for: Insights into the dynamics between viruses and their hosts in a hot spring microbial mat
Source: PubMed Central journal article supplement (PMC7490370; doi:10.1038/s41396-020-0705-4), 2020-07-13

Supplementary Figure S2: Number of detected viral-like contigs by the two different pipelines used in this study.

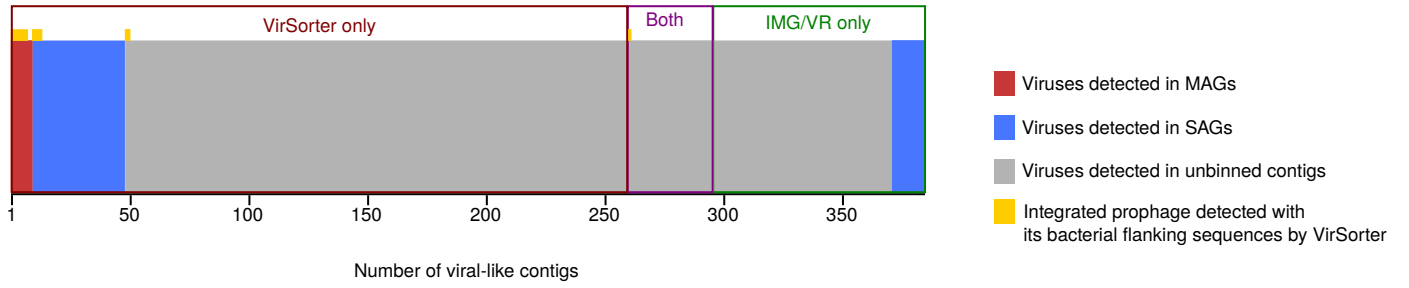

Supplement: 41396_2020_705_MOESM2_ESM.pdf [file 41396_2020_705_MOESM2_ESM.pdf]
