# Supplementary material for: Insights into the dynamics between viruses and their hosts in a hot spring microbial mat
Source: PubMed Central journal article supplement (PMC7490370; doi:10.1038/s41396-020-0705-4), 2020-07-13

**Supplementary Figure S3: Viral clusters and singletons in relation to host taxonomy.** The alluvial plot shows the complete set of the 385 detected viral contigs in this study and phylum-level taxonomy of their host, if known. Related Figure 2b shows only a subset of this figure (shows only singletons with assigned host taxonomy and only those clusters which contained some contigs with assigned host taxonomy).

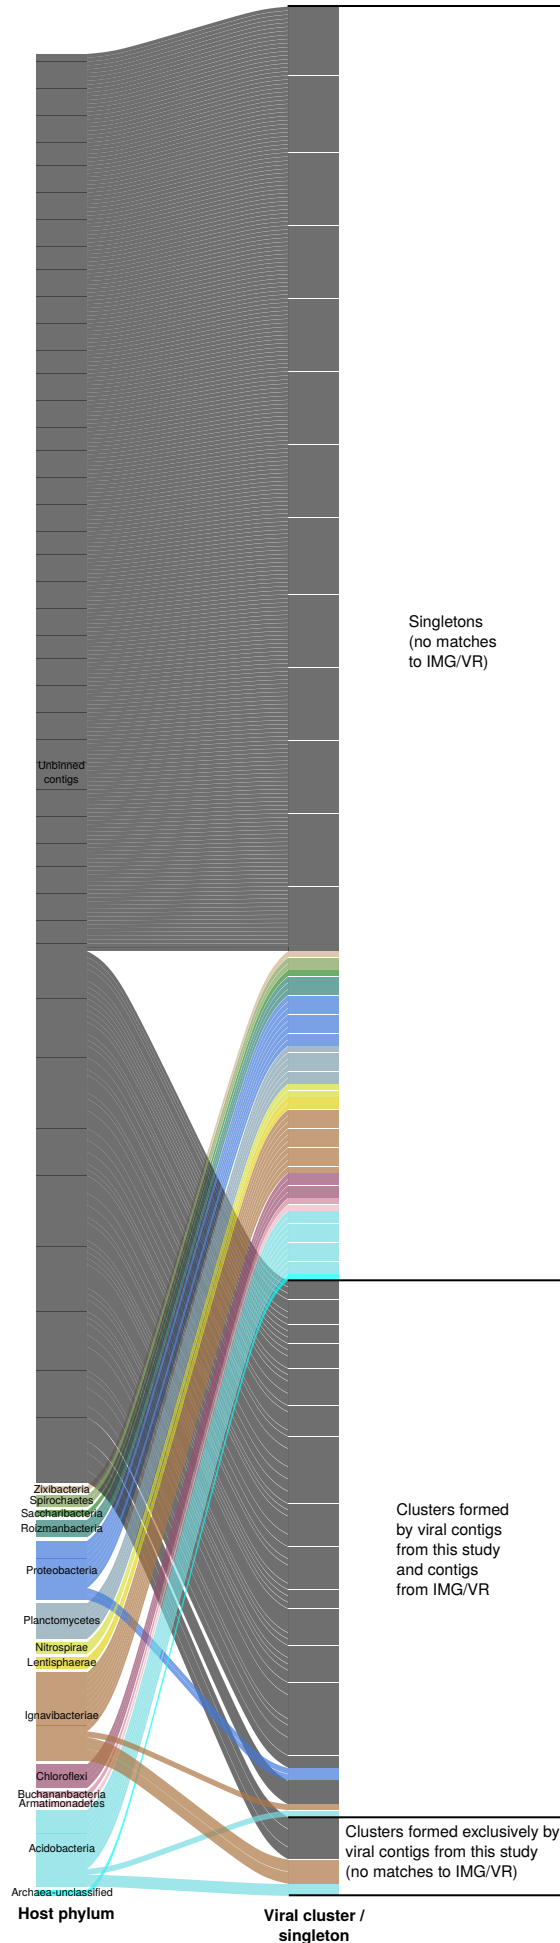

Supplement: 41396_2020_705_MOESM3_ESM.pdf [file 41396_2020_705_MOESM3_ESM.pdf]
